# Supplementary material
Source: PubMed Central journal article supplement (PMC8084721)
Supplement: mmc1.pdf [file mmc1.pdf]

## **ISN-GKHA: Structures, organization, and services for the management of kidney failure in Western Europe**

### **Supplementary Tables, Figures, and Appendix**

**Table S1.** Burden of chronic kidney disease and its risk factors in 21 countries in Western Europe that participated in the ISN-GKHA survey.

**Figure S1.** Shortages of kidney failure care providers identified by the 21 Western European countries that participated in the ISN-GKHA survey.

**Figure S2.** Proportion of patients starting dialysis with different forms of vascular access and adequate education.

**Figure S3.** Quality indicators monitored and reported by countries that participated in the ISN-GKHA survey.

**Figure S4.** Registry characteristics for countries that reported having one or more registries in the ISN-GKHA survey (see also Figure 5).

**Figure S5.** Availability of services to diagnose and treat complications of kidney failure.

**Figure S6.** National strategies available in countries.

**Figure S7.** Population covered under national non-communicable disease and chronic kidney disease strategies.

**Supplementary Appendix:** Reference list for annual cost of kidney replacement therapy (for Table 1).

**Table S1.** Burden of chronic kidney disease and its risk factors in 21 countries in Western Europe that participated in the ISN-GKHA survey.\*S1, S2

| Country        | CKD prevalence %<br>(95% CI) | Death attributed to CKD<br>% (95% CI) | DALYs attributed to CKD<br>% (95% CI) | Obesity<br>% (95% CI) | Increased BP<br>% (95% CI) | Smoking<br>% (95% CI) |
|----------------|------------------------------|---------------------------------------|---------------------------------------|-----------------------|----------------------------|-----------------------|
| Austria        | 10.23 (9.46–11.15)           | 3.38 (3.23–3.55)                      | 1.52 (1.37–1.67)                      | 21.9 (17.5–26.8)      | 21.0 (15.7–27.1)           | 25.2 (22.8–27.8)      |
| Belgium        | 10.33 (9.53–11.27)           | 1.93 (1.81–2.05)                      | 1.06 (0.97–1.15)                      | 24.5 (20.7–28.5)      | 17.5 (12.9–23.0)           | 18.7 (17.0–20.4)      |
| Denmark        | 10.14 (9.34–11.03)           | 1.79 (1.69–1.89)                      | 1.10 (1.00–1.21)                      | 21.3 (17.5–25.3)      | 20.6 (15.9–25.7)           | 17.5 (16.0–19.1)      |
| Finland        | 10.75 (9.94–11.70)           | 1.03 (0.98–1.09)                      | 0.74 (0.67–0.81)                      | 24.9 (21.2–28.7)      | 19.4 (15.2–24.1)           | 16.8 (15.2–18.6)      |
| France         | 9.88 (9.08–10.79)            | 1.60 (1.50–1.71)                      | 0.95 (0.86–1.03)                      | 23.2 (18.8–27.8)      | 22.0 (16.6–27.8)           | 21.4 (19.3–23.4)      |
| Germany        | 11.46 (10.56–12.52)          | 2.82 (2.68–2.99)                      | 1.48 (1.34–1.61)                      | 25.7 (21.9–29.8)      | 19.9 (14.7–25.1)           | 21.2 (19.2–23.3)      |
| Greece         | 11.01 (10.12–12.07)          | 2.98 (2.82–3.15)                      | 1.75 (1.60–1.91)                      | 27.4 (22.5–32.7)      | 19.1 (13.8–25.3)           | 31.2 (28.9–33.5)      |
| Iceland        | 7.87 (7.28–8.55)             | 1.21 (1.14–1.30)                      | 0.74 (0.67–0.82)                      | 23.1 (19.1–27.4)      | 19.7 (14.1–25.9)           | 14.7 (12.9–16.5)      |
| Ireland        | 8.68 (8.04–9.41)             | 1.88 (1.77–2.01)                      | 0.95 (0.86–1.05)                      | 26.9 (22.3–31.7)      | 19.7 (14.7–25.3)           | 21.6 (19.2–24.2)      |
| Israel         | 7.84 (7.27–8.51)             | 4.91 (4.64–5.21)                      | 2.13 (1.89–2.40)                      | 26.7 (21.9–31.6)      | 16.6 (11.7–22.4)           | 17.8 (15.9–20.0)      |
| Italy          | 10.60 (9.77–11.53)           | 10.60 (9.77–11.53)                    | 1.27 (1.14–1.39)                      | 22.9 (19.3–26.8)      | 21.2 (16.2–26.3)           | 19.4 (17.7–21.4)      |
| Liechtenstein  | –                            | –                                     | –                                     | –                     | –                          | –                     |
| Luxembourg     | 9.39 (8.65–10.21)            | 1.92 (1.77–2.08)                      | 1.03 (0.92–1.14)                      | 24.2 (19.4–29.4)      | 21.9 (16.3–27.9)           | 20.9 (18.4–23.6)      |
| Malta          | 10.91 (10.08–11.87)          | 2.37 (2.22–2.52)                      | 1.46 (1.31–1.61)                      | 31.0 (25.1–37.0)      | 19.4 (13.8–25.5)           | 18.8 (16.6–20.9)      |
| Netherlands    | 10.64 (9.86–11.56)           | 1.76 (1.67–1.87)                      | 1.00 (0.91–1.09)                      | 23.1 (19.3–27.0)      | 18.7 (14.4–23.7)           | 17.9 (16.2–19.5)      |
| Norway         | 9.30 (8.65–10.05)            | 1.43 (1.38–1.48)                      | 0.82 (0.75–0.90)                      | 25.0 (20.9–29.2)      | 19.7 (14.7–25.0)           | 15.3 (13.6–17.2)      |
| Portugal       | 11.44 (10.55–12.42)          | 2.73 (2.58–2.90)                      | 1.63 (1.48–1.78)                      | 23.2 (18.8–27.8)      | 24.4 (18.2–31.2)           | 17.8 (15.9–19.8)      |
| Spain          | 9.60 (8.83–10.5)             | 2.55 (2.39–2.71)                      | 1.29 (1.17–1.41)                      | 27.1 (23.2–31.1)      | 19.2 (14.5–24.6)           | 21.8 (19.7–24.0)      |
| Sweden         | 11.84 (11.0–12.85)           | 1.59 (1.51–1.68)                      | 0.97 (0.88–1.06)                      | 22.1 (18.3–26.0)      | 19.3 (14.7–24.3)           | 11.4 (10.7–12.2)      |
| Switzerland    | 10.31 (9.52–11.2)            | 2.41 (2.27–2.57)                      | 1.13 (1.02–1.25)                      | 21.2 (17.3–25.3)      | 18.0 (13.5–23.2)           | 19.1 (17.1–21.3)      |
| United Kingdom | 8.96 (8.33–9.77)             | 1.11 (1.09–1.13)                      | 0.77 (0.71–0.83)                      | 29.5 (26.6–32.5)      | 15.2 (12.2–18.3)           | 18.7 (17.0–20.4)      |

Abbreviations: ISN: International Society of Nephrology; GKHA: Global Kidney Health Atlas; CKD: chronic kidney disease; DALYs: disability-adjusted life years, BP: blood pressure; CI: confidence interval

\*: Results are expressed as percentage (%) of the population

–: Data not reported/unavailable.

**Figure S1.** Shortages of kidney failure care providers identified by the 21 Western European countries that participated in the ISN-GKHA survey.

|                  | Nephrologists | Transplant surgeons | Surgeons (HD access) | Surgeons (PD access) | Interventional radiologists (HD access) | Interventional radiologists (PD access) | Laboratory technicians | Dietitians | Radiologists (ultrasound) | Vascular access coordinators | Counsellors/psychologists | Transplant coordinators | Dialysis nurses | Dialysis technicians | TOTAL SHORTAGE |
|------------------|---------------|---------------------|----------------------|----------------------|-----------------------------------------|-----------------------------------------|------------------------|------------|---------------------------|------------------------------|---------------------------|-------------------------|-----------------|----------------------|----------------|
| Total shortage → | 9             | 4                   | 8                    | 4                    | 4                                       | 1                                       | 5                      | 0          | 0                         | 6                            | 5                         | 1                       | 9               | 2                    |                |
| Austria          |               |                     |                      |                      |                                         |                                         |                        |            |                           |                              |                           |                         |                 |                      | 5              |
| Belgium          |               |                     |                      |                      |                                         |                                         |                        |            |                           |                              |                           |                         |                 |                      | 1              |
| Denmark          |               |                     |                      |                      |                                         |                                         |                        |            |                           |                              |                           |                         |                 |                      | 3              |
| Finland          |               |                     |                      |                      |                                         |                                         |                        |            |                           |                              |                           |                         |                 |                      | 0              |
| France           |               |                     |                      |                      |                                         |                                         |                        |            |                           |                              |                           |                         |                 |                      | 0              |
| Germany          |               |                     |                      |                      |                                         |                                         |                        |            |                           |                              |                           |                         |                 |                      | 7              |
| Greece           |               |                     |                      |                      |                                         |                                         |                        |            |                           |                              |                           |                         |                 |                      | 3              |
| Iceland          |               |                     |                      |                      |                                         |                                         |                        |            |                           |                              |                           |                         |                 |                      | 2              |
| Ireland          |               |                     |                      |                      |                                         |                                         |                        |            |                           |                              |                           |                         |                 |                      | 9              |
| Israel           |               |                     |                      |                      |                                         |                                         |                        |            |                           |                              |                           |                         |                 |                      | 4              |
| Italy            |               |                     |                      |                      |                                         |                                         |                        |            |                           |                              |                           |                         |                 |                      | 1              |
| Liechtenstein    |               |                     |                      |                      |                                         |                                         |                        |            |                           |                              |                           |                         |                 |                      | 0              |
| Luxembourg       |               |                     |                      |                      |                                         |                                         |                        |            |                           |                              |                           |                         |                 |                      | 2              |
| Malta            |               |                     |                      |                      |                                         |                                         |                        |            |                           |                              |                           |                         |                 |                      | 9              |
| Netherlands      |               |                     |                      |                      |                                         |                                         |                        |            |                           |                              |                           |                         |                 |                      | 1              |
| Norway           |               |                     |                      |                      |                                         |                                         |                        |            |                           |                              |                           |                         |                 |                      | 5              |
| Portugal         |               |                     |                      |                      |                                         |                                         |                        |            |                           |                              |                           |                         |                 |                      | 1              |
| Spain            |               |                     |                      |                      |                                         |                                         |                        |            |                           |                              |                           |                         |                 |                      | 0              |
| Sweden           |               |                     |                      |                      |                                         |                                         |                        |            |                           |                              |                           |                         |                 |                      | 3              |
| Switzerland      |               |                     |                      |                      |                                         |                                         |                        |            |                           |                              |                           |                         |                 |                      | 2              |
| United Kingdom   |               |                     |                      |                      |                                         |                                         |                        |            |                           |                              |                           |                         |                 |                      | 0              |

Abbreviations: ISN: International Society of Nephrology; GKHA: Global Kidney Health Atlas; HD: hemodialysis; PD: peritoneal dialysis

|  |             |
|--|-------------|
|  | No shortage |
|  | Shortage    |

**Figure S2.** Proportion of patients starting dialysis with different forms of vascular access and adequate education.

**Western Europe**

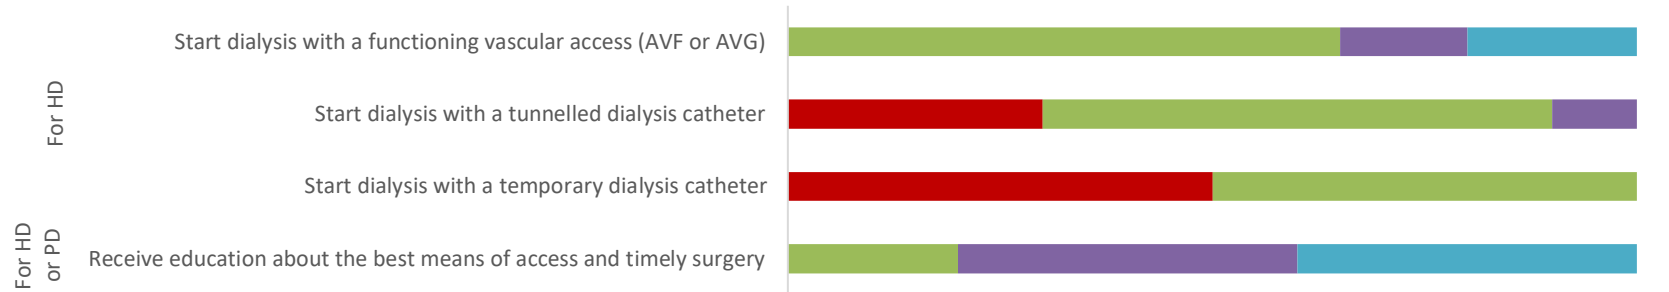

**Global**

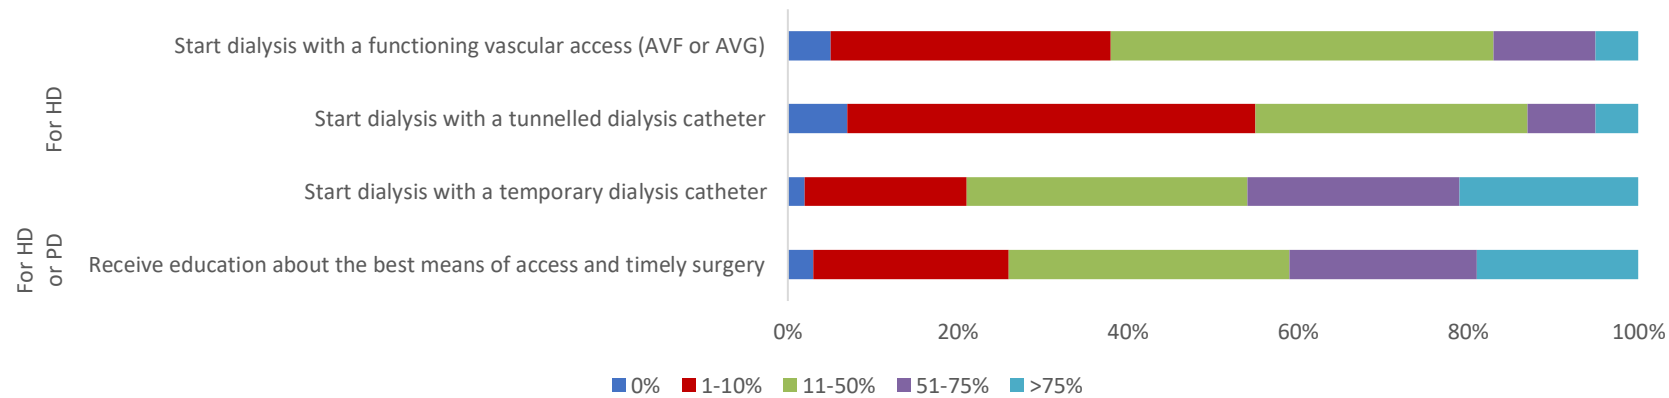

Abbreviations: HD: hemodialysis; PD: peritoneal dialysis; AVF: arteriovenous fistula; AVG: arteriovenous graft

**Figure S3.** Quality indicators monitored and reported by countries that participated in the ISN-GKHA survey.

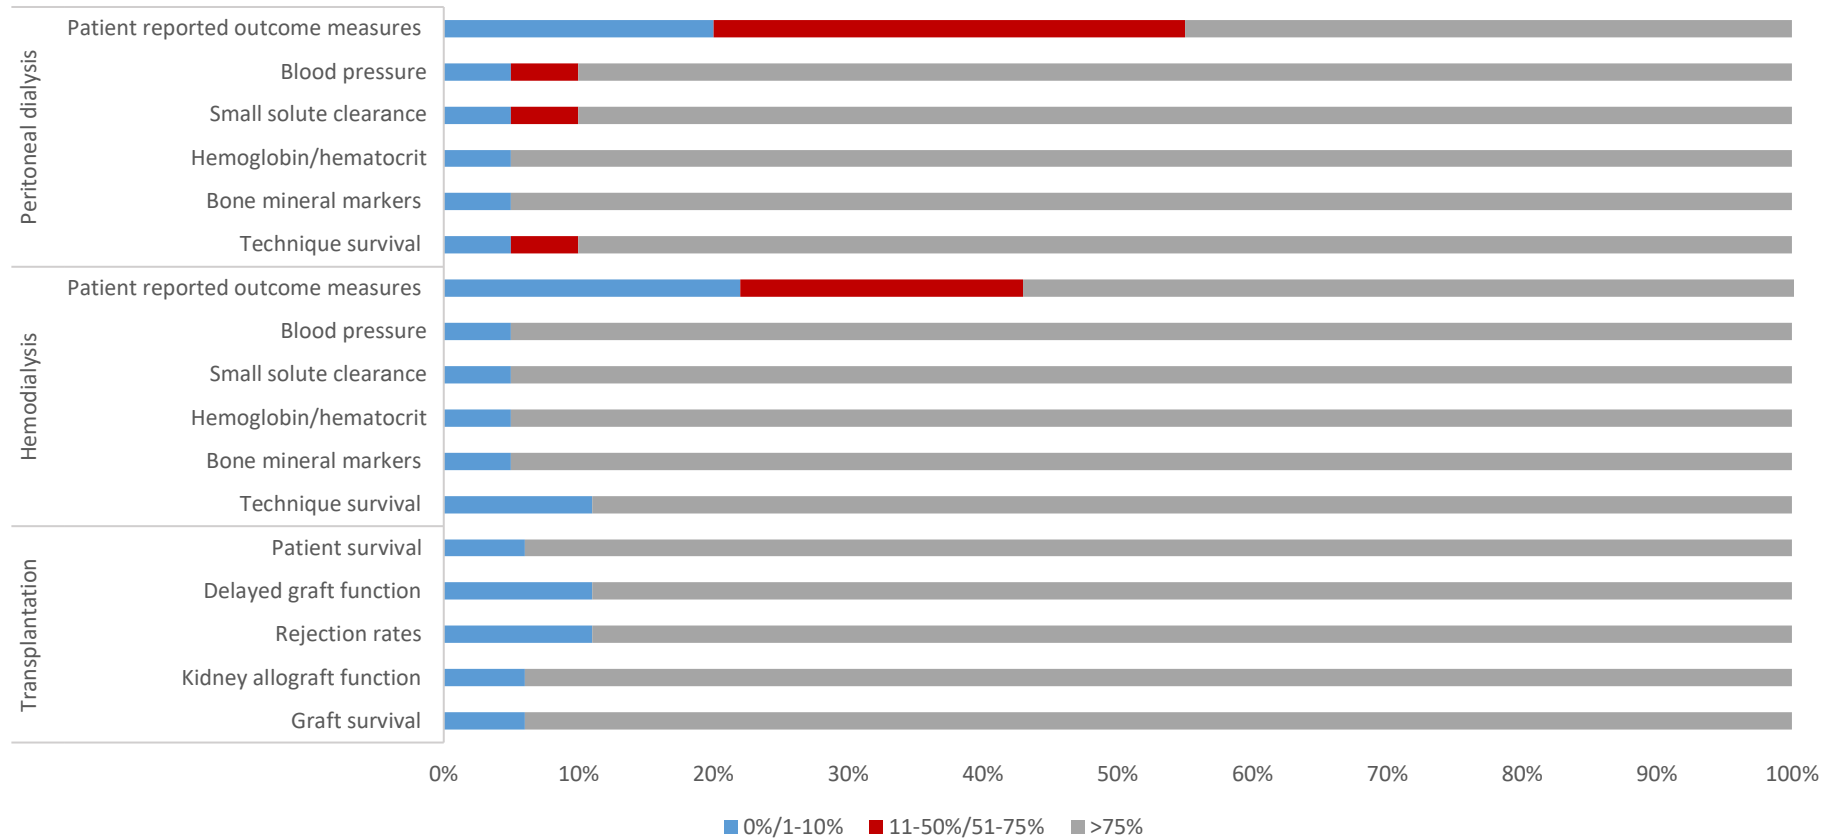

Abbreviations: ISN: International Society of Nephrology; GKHA: Global Kidney Health Atlas

**Figure S4.** Registry characteristics for countries that reported having one or more registries in the ISN-GKHA survey (see also Figure 5).

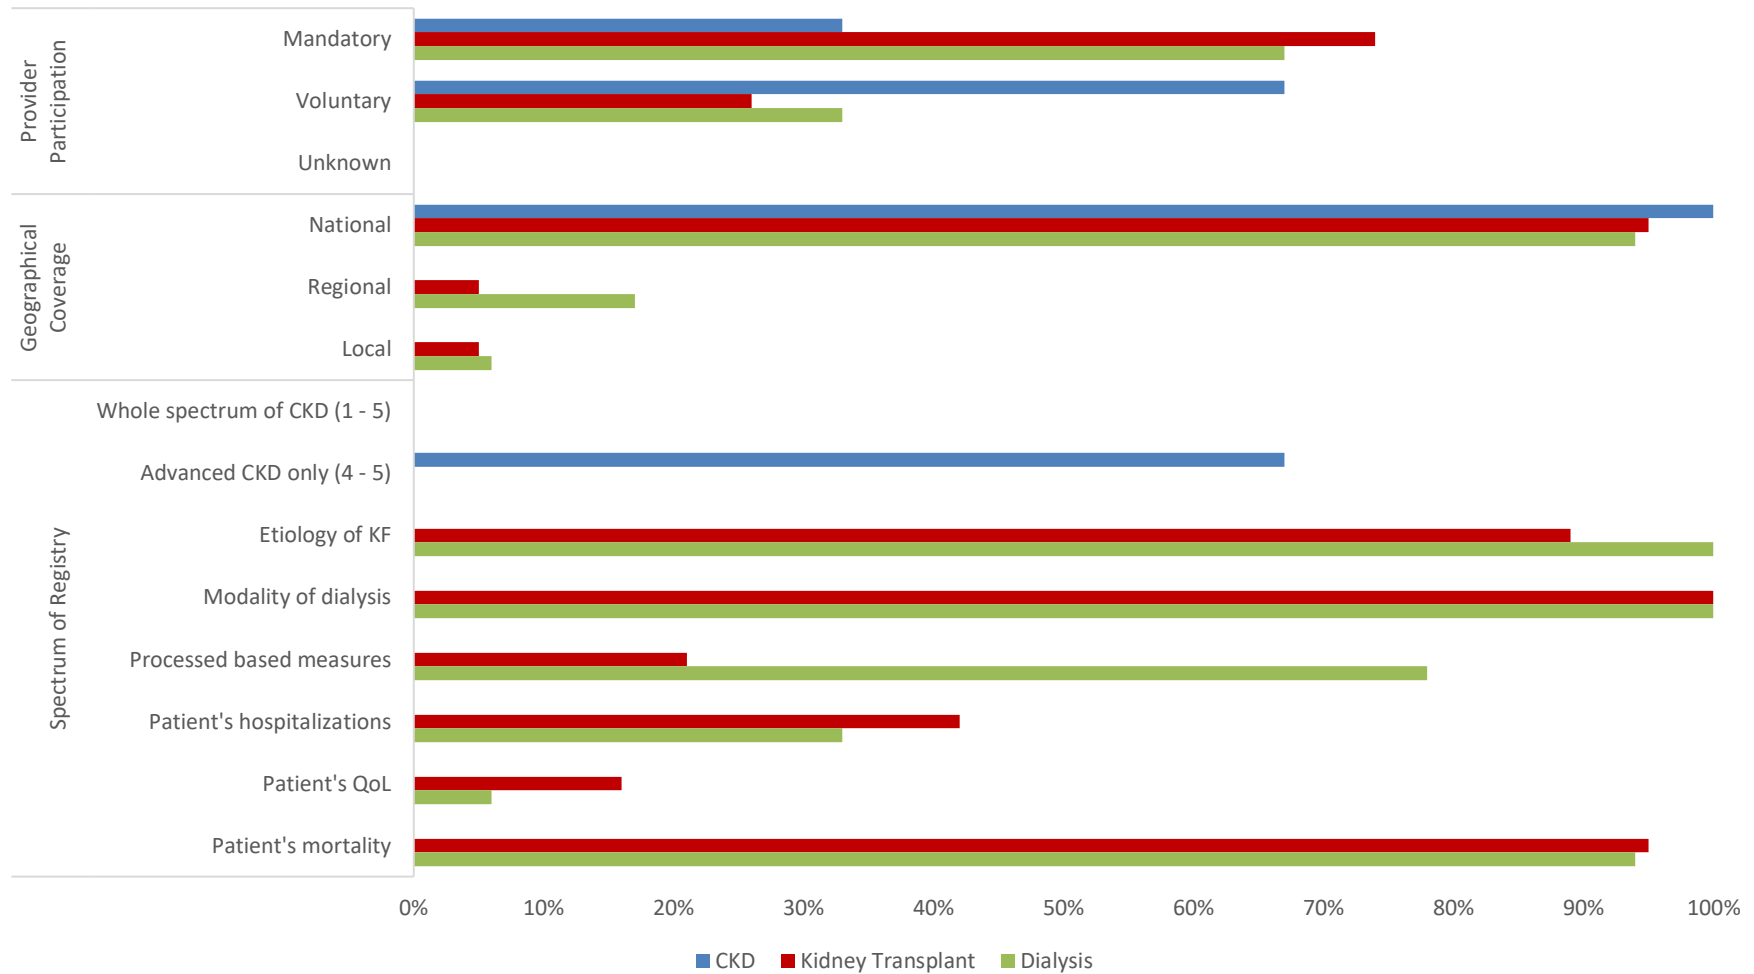

Three countries reported having a chronic kidney disease registry, 18 reported having a dialysis registry, and 19 reported having a transplantation registry.

Abbreviations: KF: kidney failure; CKD: chronic kidney disease; QoL: quality of life

**Figure S5.** Availability of services to diagnose and treat complications of kidney failure.

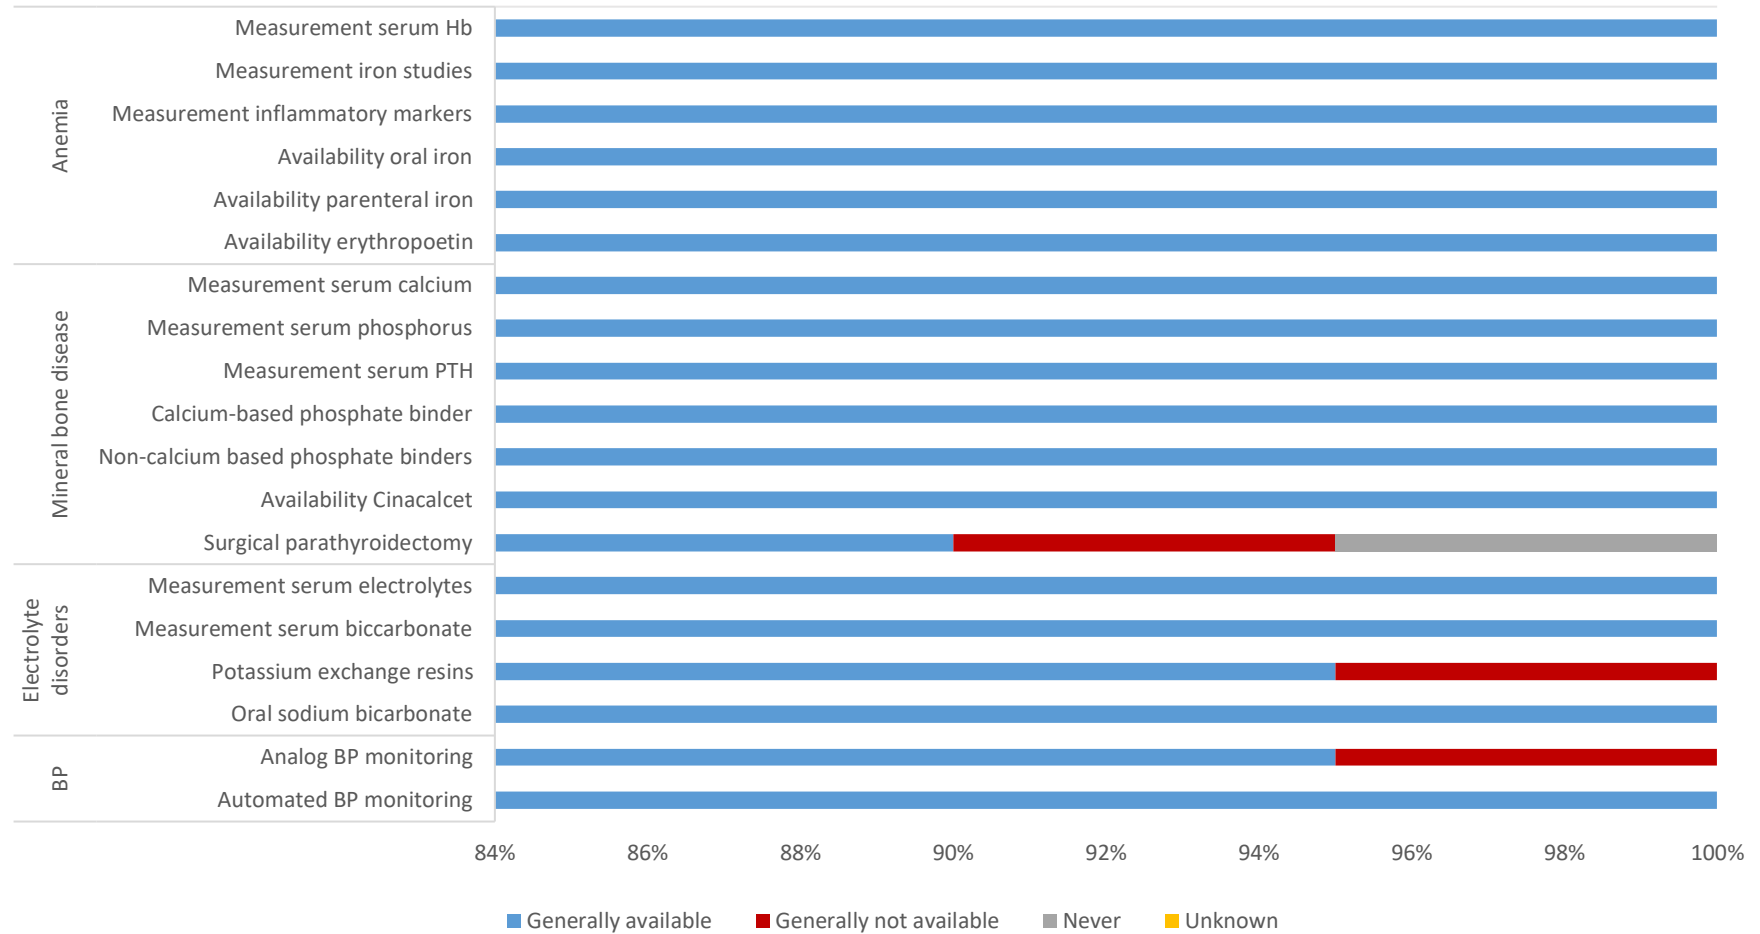

Abbreviations: Hb: hemoglobin; PTH: parathyroid hormone; BP: blood pressure

**Figure S6.** National strategies available in countries.

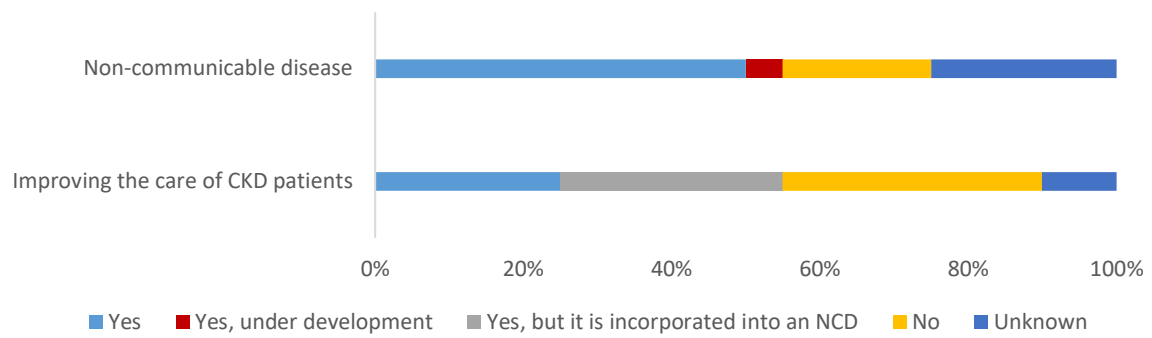

Abbreviation: CKD: chronic kidney disease; NCD: non-communicable disease

**Figure S7.** Population covered under national non-communicable disease and chronic kidney disease strategies.

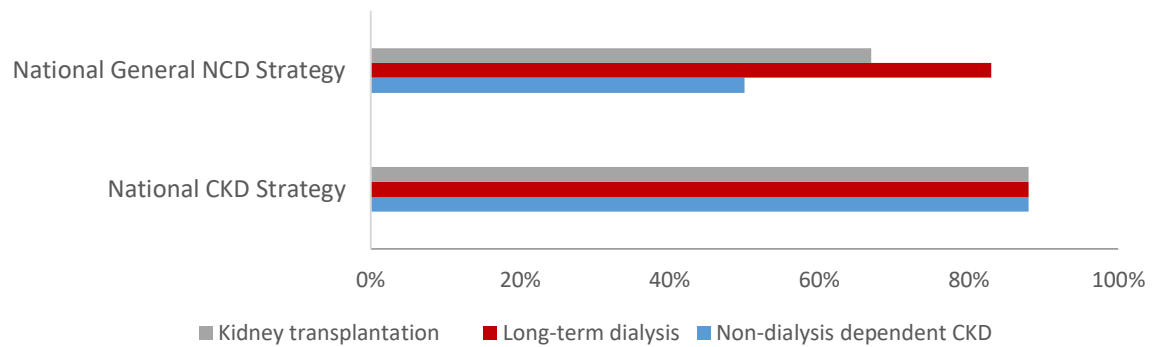

Abbreviation: CKD: chronic kidney disease; NCD: non-communicable disease



### Supplementary References:

- S1. Institute for Health Metrics and Evaluation. Global Burden of Disease Study 2017 (GBD 2017) Data Resources. Available at: <http://ghdx.healthdata.org/gbd-2017>. Accessed August 6, 2020.
- S2. World Health Organization. The Global Health Observatory. Available at: <https://www.who.int/gho/en/>. Published 2019. Accessed: August 6, 2020.

**Appendix:** Reference list for annual cost of kidney replacement therapy (Table 1) (APA format).

- Baboolal, K., McEwan, P., Sondhi, S., Spiewanowski, P., Wechowski, J., & Wilson, K. (2008). The cost of renal dialysis in a UK setting—a multicentre study. *Nephrology Dialysis Transplantation*, 23(6), 1982-1989.
- Benain, J. P., Faller, B., Briat, C., Jacquelinet, C., Brami, M., Aoustin, M., ... & Duru, G. (2007). Cost of dialysis in France. *Néphrologie & thérapeutique*, 3(3), 96-106.
- Blotiere, P. O., Tuppin, P., Weill, A., Ricordeau, P., & Allemand, H. (2010). The cost of dialysis and kidney transplantation in France in 2007, impact of an increase of peritoneal dialysis and transplantation. *Néphrologie & thérapeutique*, 6(4), 240-247.
- Cantaluppi, A., & East, P. (2000). Technical and economic strategies of maintenance dialysis in the UK and Nordic Countries. *Journal of nephrology*, 13, S10-5.
- Cavallo, M. C., Sepe, V., Conte, F., Abelli, M., Ticozzelli, E., Bottazzi, A., & Geraci, P. M. (2014, December). Cost-effectiveness of kidney transplantation from DCD in Italy. In *Transplantation proceedings* (Vol. 46, No. 10, pp. 3289-3296). Elsevier.
- Chaib-Eddour, D., Chaib-Eddour, H., Malaise, J., Mourad, M., & Squifflet, J. P. (2005, July). Cost of renal transplant in Belgium. In *Transplantation proceedings* (Vol. 37, No. 6, pp. 2819-2820). Elsevier.
- Cleemput, I., & De Laet, C. (2013). Analysis of the costs of dialysis and the effects of an incentive mechanism for low-cost dialysis modalities. *Health Policy*, 110(2-3), 172-179.

- Cleemput, I., Beguin, C., & de la Kethule, Y. (2010). Organisation et financement de la dialyse chronique en Belgique. Health Technology Assessment (HTA). Bruxelles Centre federal d'expertise des soins de sante (KCE).
- Coentrão, L. A., Araújo, C. S., Ribeiro, C. A., Dias, C. C., & Pestana, M. J. (2013). Cost analysis of hemodialysis and peritoneal dialysis access in incident dialysis patients. *Peritoneal Dialysis International*, 33(6), 662-670.
- Cogny-Van Weydevelt, F., Bacquaert-Dufour, K., Bénévent, D., Lavaud, S., & Beaud, J. M. (1999). A cost-effectiveness analysis of continuous ambulatory peritoneal dialysis vs. Self-care in-center hemodialysis in France. *Dialysis & transplantation*, 28(2), 70-74.
- De Francisco, A. L. M., & de Francisco, A. L. (2011). Sustainability and equity of renal replacement therapy in Spain. *Nefrología (English Edition)*, 31(3), 241-246.
- De Wit, G. A., Ramsteijn, P. G., & de Charro, F. T. (1998). Economic evaluation of end stage renal disease treatment. *Health policy*, 44(3), 215-232.
- Eriksson, J. K., Neovius, M., Jacobson, S. H., Elinder, C. G., & Hylander, B. (2016). Healthcare costs in chronic kidney disease and renal replacement therapy: a population-based cohort study in Sweden. *BMJ open*, 6(10), e012062.
- Ess, S. M. (2004). Prevalence and direct medical costs of end-stage renal disease in patients with type 2 diabetes mellitus in Switzerland for 2001. *Swiss medical weekly*, 134(3132).
- Gonzalez-Perez, J. G., Vale, L., Stearns, S. C., & Wordsworth, S. (2005). Hemodialysis for end-stage renal disease: A cost-effectiveness analysis of treatment options. *International Journal of Technology Assessment in Health Care*, 21(1), 32.
- Greiner, W., Obermann, K., & Schulenburg, J. M. (2001). Socio-economic evaluation of kidney transplantation in Germany. *Arch Hell Med*, 18, 147-55.
- Grün, R. P., Constantinovici, N., Normand, C., & Lamping, D. L. (2003). Costs of dialysis for elderly people in the UK. *Nephrology Dialysis Transplantation*, 18(10), 2122-2127.
- Haller, M., Gutjahr, G., Kramar, R., Hannoncourt, F., & Oberbauer, R. (2011). Cost-effectiveness analysis of renal replacement therapy in Austria. *Nephrology Dialysis Transplantation*, 26(9), 2988-2995.

- Hallinen, T., Soini, E. J., Martikainen, J. A., Ikäheimo, R., & Ryyänen, O. P. (2009). Costs and quality of life effects of the first year of renal replacement therapy in one Finnish treatment centre. *Journal of medical economics*, 12(2), 136-140.
- Haycox, A., & Jones, D. (1996). The cost effectiveness of renal provision in the UK. *Journal of management in medicine*.
- Iannazzo, S., Carsi, M., & Chiroli, S. (2012). A cost-utility analysis of cinacalcet in secondary hyperparathyroidism in five European countries. *Applied health economics and health policy*, 10(2), 127-138.
- Icks, A., Haastert, B., Gandjour, A., Chernyak, N., Rathmann, W., Giani, G., ... & Koch, M. (2010). Costs of dialysis—a regional population-based analysis. *Nephrology Dialysis Transplantation*, 25(5), 1647-1652.
- Jakobsen, A., Albrechtsen, D., Sødal, G., Flatmark, A., Fauchald, P., & Vartdal, F. (1990). Costs of care in uremia. How much does kidney transplantation cost?. *Tidsskrift for den Norske Laegeforening: Tidsskrift for Praktisk Medicin, ny Raekke*, 110(3), 338-341.
- Jensen, C. E., Sørensen, P., & Petersen, K. D. (2014). In Denmark kidney transplantation is more cost-effective than dialysis. *Dan Med J*, 61(3), A4796.
- Jönsson, L., Carides, G. W., Burke, T. A., Brandt, A. S. I., Salonen, T., Schön, S., & Weiss, L. (2005). Cost-effective prevention of renal failure in type 2 diabetics using losartan. *Journal of Medical Economics*, 8(1-4), 131-138.
- Jürgensen, J. S., Ikenberg, R., Greiner, R. A., & Hösel, V. (2015). Cost-effectiveness of modern mTOR inhibitor based immunosuppression compared to the standard of care after renal transplantation in Germany. *The European Journal of Health Economics*, 16(4), 377-390.
- Keller, F., Dress, H., Mertz, A., & Marckmann, G. (2007). Money and dialysis. *Medical Clinic*, 102 (8), 659-664.
- Kerr, M., Bray, B., Medcalf, J., O'Donoghue, D. J., & Matthews, B. (2012). Estimating the financial cost of chronic kidney disease to the NHS in England. *Nephrology Dialysis Transplantation*, 27(suppl\_3), iii73-iii80.

- Kirby, L., & Vale, L. (2001). Dialysis for end-stage renal disease. *International journal of technology assessment in health care*, 17(2), 181.
- Kleophas, W., & Reichel, H. (2007). International study of health care organization and financing: development of renal replacement therapy in Germany. *International journal of health care finance and economics*, 7(2-3), 185-200.
- Komenda, P., Gavaghan, M. B., Garfield, S. S., Poret, A. W., & Sood, M. M. (2012). An economic assessment model for in-center, conventional home, and more frequent home hemodialysis. *Kidney international*, 81(3), 307-313.
- Kontodimopoulos, N., & Niakas, D. (2008). An estimate of lifelong costs and QALYs in renal replacement therapy based on patients' life expectancy. *Health Policy*, 86(1), 85-96.
- Koukou, M. G., Smyrniotis, V. E., Arkadopoulou, N. F., & Grapsa, E. I. (2017). PD vs HD in Post-Economic Crisis Greece—differences in patient characteristics and estimation of therapy cost. *Peritoneal Dialysis International*, 37(5), 568-573.
- Lamas Barreiro, JM, Alonso Suarez, M., Saavedra Alonso, JA, & Gándara Martínez, A. (2011). Costs and added value of haemodialysis and peritoneal dialysis outsourcing agreements. *Nephrology (English Edition)*, 31 (6), 656-663.
- Lamas, J., Alonso, M., Saavedra, J., Garcia-Trio, G., Rionda, M., & Ameijeiras, M. (2001). Costs of chronic dialysis in a public hospital: myths and realities. *Nefrologia: publicacion oficial de la Sociedad Espanola Nefrologia*, 21(3), 283.
- Li, B., Cairns, J. A., Fotheringham, J., Tomson, C. R., Forsythe, J. L., Watson, C., ... & Dudley, C. (2015). Understanding cost of care for patients on renal replacement therapy: looking beyond fixed tariffs. *Nephrology Dialysis Transplantation*, 30(10), 1726-1734.
- Lorenzo, V., Perestelo, L., Barroso, M., Torres, A., & Nazco, J. (2010). Economic evaluation of haemodialysis. Analysis of cost components based on patient-specific data. *Nephrology (English Edition)*, 30 (4), 403-412.
- Mackenzie, P., & Mactier, R. A. (1998). Home haemodialysis in the 1990s. *Nephrology, dialysis, transplantation: official publication of the European Dialysis and Transplant Association-European Renal Association*, 13(8), 1944-1948.

- Maschoreck, T. R., Sørensen, M. C., Andresen, M., Høgsberg, I. M., Rasmussen, P., & Sjøgaard, J. (1998). Cost analysis of dialysis treatment at the Odense University Hospital and the Sønderborg Hospital. *Ugeskrift for læger*, 160(51), 7418-7424.
- Moore, R., & Marriott, N. (1999). Cost and price in the NHS: the importance of monetary value in the decision-making framework—the case of purchasing renal replacement therapy. *Health services management research*, 12(1), 1-14.
- Naoum, P., Topkaroglou, I., Kitsonis, D., Skroumpelos, A., Athanasakis, K., Iatrou, C., ... & Kyriopoulos, J. (2016). Cost calculations during “Dire Straits”: A cost-of-illness analysis of regular hemodialysis for end-stage renal disease in Greece.
- Neil, N., Walker, D. R., Sesso, R., Blackburn, J. C., Tschosik, E. A., Sciaraffia, V., ... & Bhattacharyya, S. K. (2009). Gaining efficiencies: resources and demand for dialysis around the globe. *Value in Health*, 12(1), 73-79.
- Parra, E. M., Arenas, M. J., Alonso, M., Martínez, M. F., Gámen, A. P., Rebollo, P., ... & Álvarez-Ude, F. (2011). Multicentre study of haemodialysis costs. *Nefrologia: publicacion oficial de la Sociedad Espanola Nefrologia*, 31(3), 299-307.
- Pike, E., Hamidi, V., Ringerike, T., Wisloff, T., & Klemp, M. (2017). More use of peritoneal dialysis gives significant savings: a systematic review and health economic decision model. *Journal of clinical medicine research*, 9(2), 104.
- Pontoriero, G., Pozzoni, P., Del Vecchio, L., & Locatelli, F. (2007). International Study of Health Care Organization and Financing for renal replacement therapy in Italy: an evolving reality. *International journal of health care finance and economics*, 7(2-3), 201-215.
- Rocha, M. J., Ferreira, S., Martins, L. S., Almeida, M., Dias, L., Pedroso, S., ... & Cabrita, A. (2012). Cost analysis of renal replacement therapy by transplant in a system of bundled payment of dialysis. *Clinical transplantation*, 26(4), 529-531.
- Rodriguez-Carmona, A., Fontan, M. P., Bouza, P., Falcon, T. G., & Valdes, F. (1996). The economic cost of dialysis: a comparison between peritoneal dialysis and in-center hemodialysis in a Spanish unit. *Advances in Peritoneal Dialysis*, 12, 93-96.
- Sainsaulieu, Y., Sambuc, C., Logerot, H., Bongiovanni, I., & Couchoud, C. (2014). Cost of a renal graft: medico-economic analysis of the amount reimbursed by the National health

insurance to finance the preliminary and peripheral step of renal transplantation.  
*NEPHROLOGIE & THERAPEUTIQUE*, 10(4), 228-235.

Salonen, T., Reina, T., Oksa, H., Rissanen, P., & Pasternack, A. (2007). Alternative strategies to evaluate the cost-effectiveness of peritoneal dialysis and hemodialysis. *International urology and nephrology*, 39(1), 289-298.

Salonen, T., Reina, T., Oksa, H., Sintonen, H., & Pasternack, A. (2003). Cost analysis of renal replacement therapies in Finland. *American journal of kidney diseases*, 42(6), 1228-1238.

Sánchez-Escuredo, A., Alsina, A., Diekmann, F., Revuelta, I., Esforzado, N., Ricart, M. J., ... & Fernandez, E. (2015, January). Economic analysis of the treatment of end-stage renal disease treatment: living-donor kidney transplantation versus hemodialysis. In *Transplantation proceedings* (Vol. 47, No. 1, pp. 30-33). Elsevier.

Sennfalt, K., Magnusson, M., & Carlsson, P. (2002). Comparison of hemodialysis and peritoneal dialysis--a cost-utility analysis. *Peritoneal Dialysis International*, 22(1), 39-47.

Sharif, A., & Baboolal, K. (2011). Update on dialysis economics in the UK. *Peritoneal Dialysis International*, 31(2\_suppl), 58-62.

Van Biesen, W., Lameire, N., Peeters, P., & Vanholder, R. (2007). Belgium's mixed private/public health care system and its impact on the cost of end-stage renal disease. *International journal of health care finance and economics*, 7(2-3), 133-148.

van der Tol, A., Lameire, N., Morton, R. L., Van Biesen, W., & Vanholder, R. (2019). An international analysis of dialysis services reimbursement. *Clinical Journal of the American Society of Nephrology*, 14(1), 84-93.

Villa, G., Fernández-Ortiz, L., Cuervo, J., Rebollo, P., Selgas, R., González, T., & Arrieta, J. (2012). Cost-effectiveness analysis of the Spanish renal replacement therapy program. *Peritoneal dialysis international*, 32(2), 192-199.

Villa, G., Rodríguez-Carmona, A., Fernández-Ortiz, L., Cuervo, J., Rebollo, P., Otero, A., & Arrieta, J. (2011). Cost analysis of the Spanish renal replacement therapy programme. *Nephrology Dialysis Transplantation*, 26(11), 3709-3714.

Wikström, B., Fored, M., Eichleay, M. A., & Jacobson, S. H. (2007). The financing and organization of medical care for patients with end-stage renal disease in Sweden. *International journal of health care finance and economics*, 7(4), 269-281.

Wordsworth, S., Ludbrook, A., Caskey, F., & Macleod, A. (2005). Collecting unit cost data in multicentre studies. *The European Journal of Health Economics*, 6(1), 38-44.

Zambrowski, J. J. (2016). Coût de la dialyse. *Néphrologie & Thérapeutique*, 12, S95-S97.
